# Supplementary material
Source: Springer Nature journal article supplement (https://www.springermedizin.de/resource/supplementary/13023_2009_193_MOESM26_ESM.pdf/9641832)

**A**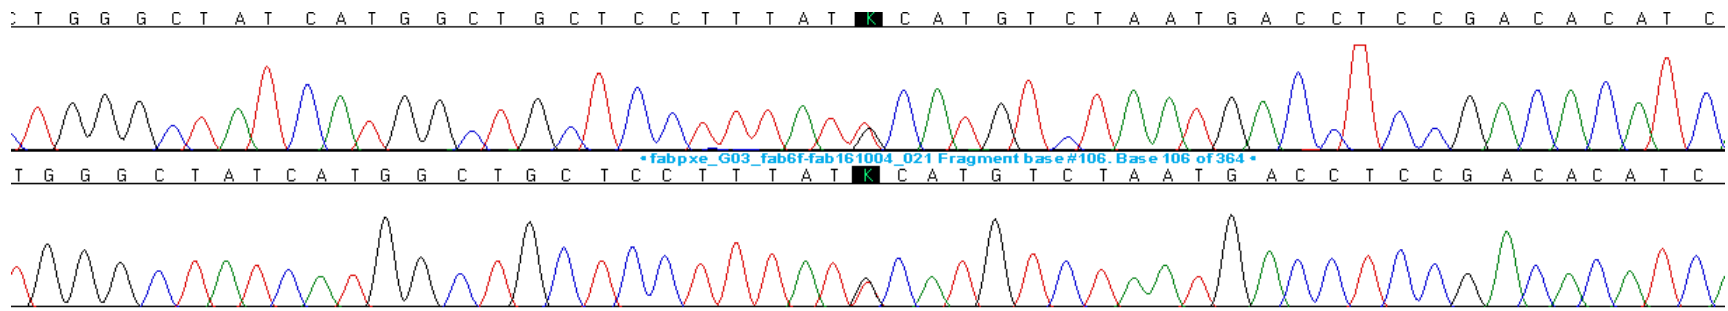**B**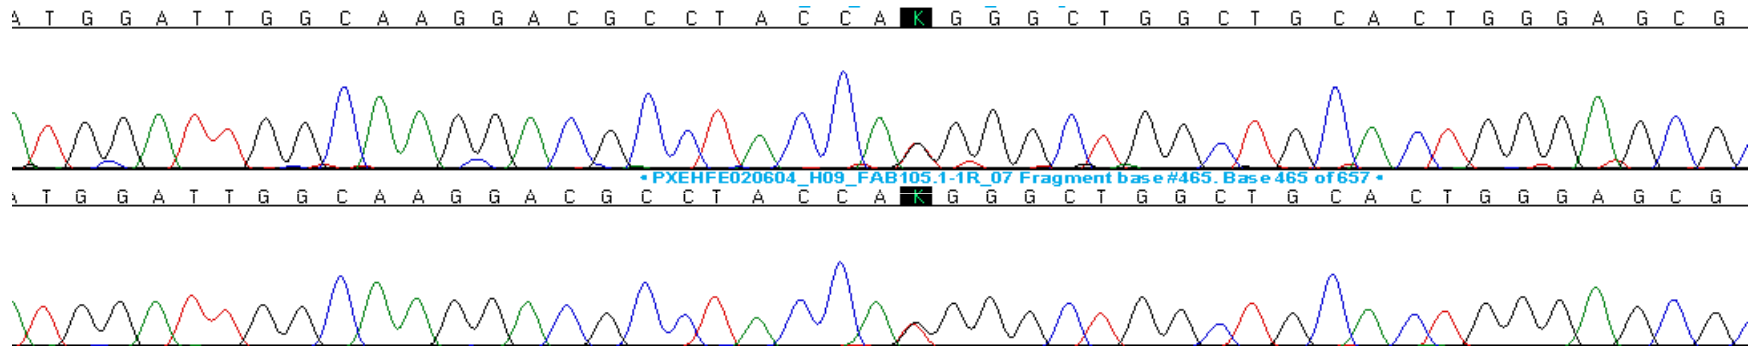**C**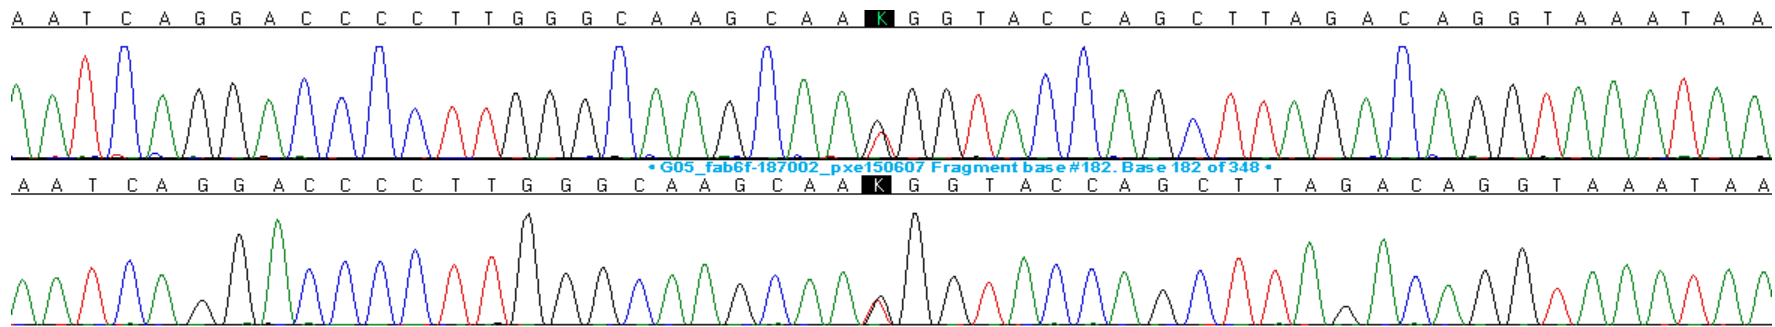

Supplement: MOESM26 [file 9641832]
